# Supplementary material
Source: Springer Nature journal article supplement (https://www.springermedizin.de/resource/supplementary/12890_2014_647_MOESM5_ESM.pdf/9505454)

Change from baseline in trough FEV<sub>1</sub> at Day 2 (L)

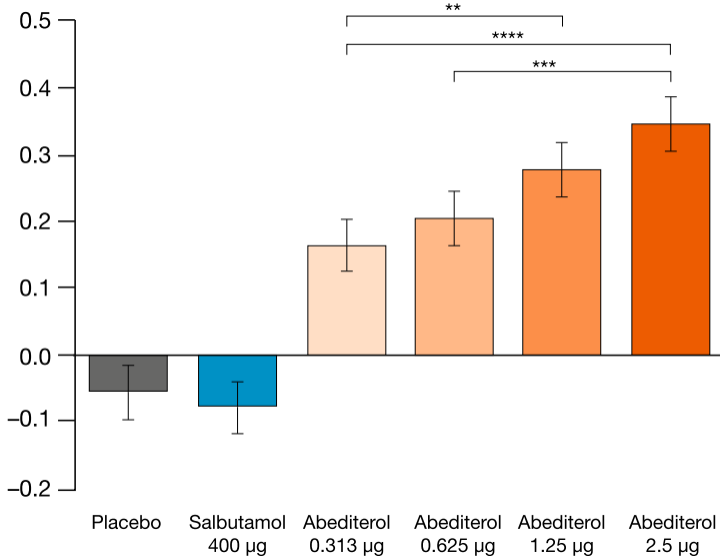

Supplement: MOESM5 [file 9505454]
